# Supplementary material for: MRI-Based Radiotherapy Planning to Reduce Rectal Dose in Excess of Tolerance
Source: Hindawi journal article supplement (doi:10.1155/2022/7930744), 2022-02-03
Supplement: f1 [file 7930744.f1.pdf]

This section shows the rectal V70, V75, V80 (planning to prostate only)

|            | CT V70 (cc) | MR V70 (cc) | deltaV70 | CT V75 (cc) | MR V75 (cc) | deltaV75 | CT V80 (cc) | MR V80 (cc) | deltaV80 |
|------------|-------------|-------------|----------|-------------|-------------|----------|-------------|-------------|----------|
| patient 1  | 8.19        | 5.64        | 2.55     | 5.79        | 4.24        | 1.55     | 2.49        | 1.99        | 0.50     |
| patient 2  | 5.81        | 4.11        | 1.70     | 4.49        | 3.23        | 1.26     | 2.75        | 2.06        | 0.69     |
| patient 3  | 5.13        | 2.99        | 2.14     | 3.74        | 2.06        | 1.68     | 2.10        | 1.16        | 0.94     |
| patient 4  | 6.81        | 6.27        | 0.54     | 5.35        | 4.49        | 0.86     | 3.28        | 2.25        | 1.03     |
| patient 5  | 12.33       | 4.92        | 7.41     | 9.77        | 3.75        | 6.02     | 6.35        | 2.41        | 3.94     |
| patient 6  | 10.24       | 4.94        | 5.30     | 7.84        | 3.77        | 4.07     | 4.58        | 2.27        | 2.31     |
| patient 7  | 10.09       | 9.79        | 0.30     | 8.10        | 7.43        | 0.67     | 5.05        | 4.72        | 0.33     |
| patient 8  | 9.37        | 8.69        | 0.68     | 7.15        | 6.76        | 0.39     | 4.10        | 4.07        | 0.03     |
| patient 9  | 7.31        | 3.55        | 3.76     | 5.84        | 2.46        | 3.38     | 3.95        | 1.17        | 2.78     |
| patient 10 | 6.98        | 6.76        | 0.22     | 4.69        | 4.61        | 0.08     | 1.53        | 1.56        | -0.03    |
| patient 11 | 8.37        | 4.50        | 3.87     | 6.42        | 3.25        | 3.17     | 3.78        | 1.39        | 2.39     |
| patient 12 | 14.24       | 13.38       | 0.86     | 10.72       | 9.44        | 1.28     | 5.41        | 4.89        | 0.52     |
| patient 13 | 10.20       | 3.92        | 6.28     | 8.17        | 2.93        | 5.24     | 4.99        | 1.68        | 3.31     |
| patient 14 | 9.29        | 9.75        | -0.46    | 7.37        | 7.47        | -0.10    | 4.59        | 4.30        | 0.29     |
| patient 15 | 10.09       | 4.25        | 5.84     | 7.59        | 2.90        | 4.69     | 3.70        | 1.09        | 2.61     |

normality test: Shapiro-Wilk test

P value 0.17 0.13 0.06

significance test: Wilcoxon paired signed rank test

see table 1 for estimate, confidence interval, and P value

This section shows the rectal V70, V75, V80 (planning to prostate + 1 cm SV)

|            | CT V70 (cc) | MR V70 (cc) | deltaV70 | CT V75 (cc) | MR V75 (cc) | deltaV70 | CT V80 (cc) | MR V80 (cc) | deltaV70 |
|------------|-------------|-------------|----------|-------------|-------------|----------|-------------|-------------|----------|
| patient 1  | 10.09       | 6.73        | 3.36     | 6.99        | 4.72        | 2.27     | 2.97        | 1.98        | 0.99     |
| patient 2  | 6.74        | 4.46        | 2.28     | 5.20        | 3.49        | 1.71     | 3.11        | 2.23        | 0.88     |
| patient 3  | 6.50        | 4.42        | 2.08     | 4.53        | 3.28        | 1.25     | 2.27        | 1.90        | 0.37     |
| patient 4  | 7.88        | 8.32        | -0.44    | 6.39        | 6.17        | 0.22     | 4.15        | 3.41        | 0.74     |
| patient 5  | 14.60       | 5.53        | 9.07     | 11.34       | 4.26        | 7.08     | 7.01        | 2.70        | 4.31     |
| patient 6  | 13.26       | 6.79        | 6.47     | 10.45       | 5.39        | 5.06     | 6.87        | 3.73        | 3.14     |
| patient 7  | 11.71       | 12.97       | -1.26    | 9.43        | 9.77        | -0.34    | 5.97        | 5.98        | -0.01    |
| patient 8  | 10.44       | 10.19       | 0.25     | 7.80        | 7.92        | -0.12    | 4.60        | 5.15        | -0.55    |
| patient 9  | 8.73        | 4.35        | 4.38     | 6.94        | 3.07        | 3.87     | 4.55        | 1.59        | 2.96     |
| patient 10 | 10.23       | 7.54        | 2.69     | 7.01        | 5.55        | 1.46     | 3.31        | 2.70        | 0.61     |
| patient 11 | 10.99       | 6.60        | 4.39     | 8.82        | 4.72        | 4.10     | 5.72        | 2.64        | 3.08     |
| patient 12 | 15.56       | 17.27       | -1.71    | 11.80       | 12.52       | -0.72    | 6.15        | 6.79        | -0.64    |
| patient 13 | 10.86       | 5.21        | 5.65     | 8.68        | 4.00        | 4.68     | 5.14        | 2.46        | 2.68     |
| patient 14 | 10.94       | 11.39       | -0.45    | 8.54        | 8.82        | -0.28    | 5.12        | 4.92        | 0.20     |
| patient 15 | 11.40       | 6.20        | 5.20     | 8.65        | 4.40        | 4.25     | 4.64        | 2.15        | 2.49     |

normality test: Shapiro-Wilk test

P value 0.76 0.25 0.18

significance test: Wilcoxon paired signed rank test

see table 1 for estimate, confidence interval, and P value

This section shows the bladder V70, V75, V80 (planning to prostate only)

|            | CTV70 (cc) | MR V70 (cc) | deltaV70 | CTV75 (cc) | MR V75 (cc) | deltaV75 | CTV80 (cc) | MR V80 (cc) | deltaV80 |
|------------|------------|-------------|----------|------------|-------------|----------|------------|-------------|----------|
| patient 1  | 8.50       | 9.25        | -0.75    | 6.55       | 7.50        | -0.95    | 4.09       | 5.24        | -1.15    |
| patient 2  | 11.26      | 7.38        | 3.88     | 9.28       | 6.05        | 3.23     | 6.92       | 4.51        | 2.41     |
| patient 3  | 4.55       | 2.97        | 1.58     | 3.52       | 2.41        | 1.11     | 2.43       | 1.84        | 0.59     |
| patient 4  | 10.43      | 6.83        | 3.60     | 8.78       | 5.50        | 3.28     | 6.87       | 3.87        | 3.00     |
| patient 5  | 11.82      | 13.65       | -1.83    | 9.44       | 10.89       | -1.45    | 6.13       | 7.09        | -0.96    |
| patient 6  | 11.92      | 9.55        | 2.37     | 9.51       | 7.76        | 1.75     | 6.66       | 5.56        | 1.10     |
| patient 7  | 26.03      | 16.40       | 9.63     | 20.54      | 13.42       | 7.12     | 14.90      | 10.10       | 4.80     |
| patient 8  | 15.26      | 15.33       | -0.07    | 12.56      | 12.65       | -0.09    | 9.42       | 9.41        | 0.01     |
| patient 9  | 12.66      | 7.94        | 4.72     | 10.20      | 6.49        | 3.71     | 7.39       | 4.53        | 2.86     |
| patient 10 | 9.66       | 10.59       | -0.93    | 7.45       | 8.50        | -1.05    | 4.83       | 5.87        | -1.04    |
| patient 11 | 15.86      | 8.55        | 7.31     | 13.06      | 6.63        | 6.43     | 9.77       | 4.43        | 5.34     |
| patient 12 | 14.18      | 11.21       | 2.97     | 11.43      | 9.11        | 2.32     | 7.66       | 6.29        | 1.37     |
| patient 13 | 18.07      | 12.15       | 5.92     | 15.09      | 9.95        | 5.14     | 10.74      | 7.40        | 3.34     |
| patient 14 | 12.66      | 8.74        | 3.92     | 10.50      | 7.08        | 3.42     | 7.90       | 4.68        | 3.22     |
| patient 15 | 14.73      | 15.76       | -1.03    | 11.92      | 12.84       | -0.92    | 8.09       | 8.78        | -0.69    |

normality test: Shapiro-Wilk test

P value 0.57 0.34 0.30

significance test: Wilcoxon paired signed rank test

see table 2 for estimate, confidence interval, and P value

This section shows the bladder V70, V75, V80 (planning to prostate + 1 cm SV)

|            | CTV70 (cc) | MR V70 (cc) | deltaV70 | CTV75 (cc) | MR V75 (cc) | deltaV70 | CTV80 (cc) | MR V80 (cc) | deltaV70 |
|------------|------------|-------------|----------|------------|-------------|----------|------------|-------------|----------|
| patient 1  | 10.80      | 8.44        | 2.36     | 8.37       | 6.78        | 1.59     | 5.27       | 4.64        | 0.63     |
| patient 2  | 14.89      | 10.42       | 4.47     | 12.46      | 8.66        | 3.80     | 9.35       | 6.49        | 2.86     |
| patient 3  | 7.71       | 4.81        | 2.90     | 6.06       | 3.76        | 2.30     | 4.03       | 2.69        | 1.34     |
| patient 4  | 10.62      | 7.69        | 2.93     | 8.90       | 6.24        | 2.66     | 6.98       | 4.54        | 2.44     |
| patient 5  | 16.50      | 13.83       | 2.67     | 13.19      | 11.00       | 2.19     | 9.00       | 7.19        | 1.81     |
| patient 6  | 14.68      | 11.61       | 3.07     | 11.63      | 9.44        | 2.19     | 8.12       | 7.03        | 1.09     |
| patient 7  | 28.34      | 17.20       | 11.14    | 22.88      | 14.10       | 8.78     | 17.07      | 10.63       | 6.44     |
| patient 8  | 20.39      | 15.33       | 5.06     | 17.16      | 12.84       | 4.32     | 12.76      | 10.05       | 2.71     |
| patient 9  | 14.90      | 9.02        | 5.88     | 12.09      | 7.52        | 4.57     | 8.80       | 5.69        | 3.11     |
| patient 10 | 17.44      | 10.62       | 6.82     | 13.41      | 8.54        | 4.87     | 9.14       | 5.92        | 3.22     |
| patient 11 | 17.94      | 9.85        | 8.09     | 14.62      | 7.76        | 6.86     | 10.86      | 5.47        | 5.39     |
| patient 12 | 16.60      | 11.46       | 5.14     | 13.30      | 9.31        | 3.99     | 8.71       | 6.55        | 2.16     |
| patient 13 | 20.89      | 13.48       | 7.41     | 17.62      | 11.35       | 6.27     | 13.32      | 8.93        | 4.39     |
| patient 14 | 17.12      | 10.28       | 6.84     | 14.32      | 8.44        | 5.88     | 10.86      | 5.97        | 4.89     |
| patient 15 | 16.27      | 18.07       | -1.80    | 13.19      | 15.05       | -1.86    | 9.13       | 11.02       | -1.89    |

normality test: Shapiro-Wilk test

P value 0.82 0.91 0.95

significance test: Wilcoxon paired signed rank test

see table 2 for estimate, confidence interval, and P value

This section shows the prostate volumes (in cc) on CT and MRI

|                    | CT prostate | MR prostate |
|--------------------|-------------|-------------|
| patient 1          | 37.0        | 23.9        |
| patient 2          | 29.9        | 28.7        |
| patient 3          | 41.3        | 38.4        |
| patient 4          | 59.6        | 37.4        |
| patient 5          | 50.5        | 33.5        |
| patient 6          | 31.0        | 19.0        |
| patient 7          | 86.1        | 71.8        |
| patient 8          | 51.5        | 38.0        |
| patient 9          | 32.8        | 18.6        |
| patient 10         | 53.9        | 40.2        |
| patient 11         | 27.1        | 20.1        |
| patient 12         | 50.9        | 27.1        |
| patient 13         | 48.9        | 26.2        |
| patient 14         | 45.2        | 15.6        |
| patient 15         | 43.9        | 23.5        |
| mean               | 46.0        | 30.8        |
| standard deviation | 14.8        | 13.9        |

normality test: Shapiro-Wilk test  
P value 0.78

significance test: two-tailed paired student's t-test  
P value <0.0001

correlation analysis: Pearson r  
r 0.8539  
95% confidence interval 0.6072 to 0.9504  
R squared 0.7291  
P value (two-tailed) <0.0001

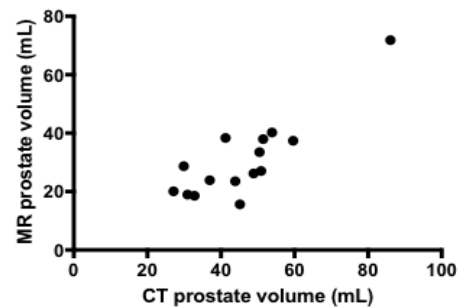

This section shows the rectal volumes (in cc) on CT and MRI

|                    | CT rectum | MR rectum |
|--------------------|-----------|-----------|
| patient 1          | 57.5      | 40.7      |
| patient 2          | 52.7      | 63.1      |
| patient 3          | 42.8      | 86.6      |
| patient 4          | 44.6      | 41.3      |
| patient 5          | 72.1      | 51.3      |
| patient 6          | 28.0      | 24.6      |
| patient 7          | 49.3      | 69.0      |
| patient 8          | 77.9      | 92.9      |
| patient 9          | 52.8      | 38.2      |
| patient 10         | 88.4      | 184.7     |
| patient 11         | 28.5      | 23.4      |
| patient 12         | 43.8      | 47.9      |
| patient 13         | 44.6      | 41.5      |
| patient 14         | 35.7      | 61.9      |
| patient 15         | 48.4      | 36.3      |
| mean               | 51.1      | 60.2      |
| standard deviation | 17.1      | 40        |

normality test: Shapiro-Wilk Test  
P value 0.005

significance test: Wilcoxon paired signed rank test  
P value 0.52

correlation analysis: Spearman r  
r 0.4786  
95% confidence inte -0.06131 to 0.8018  
P value (two-tailed) 0.0735

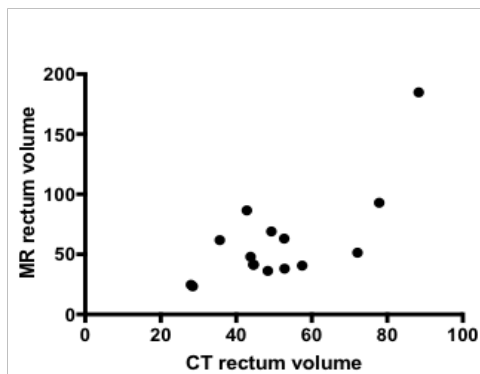

This section shows the volumes of the CT PTV3mm and the MR PTV5mm

| ID                 | CT PTV3mm | MR PTV5mm | delta PTV |
|--------------------|-----------|-----------|-----------|
| 1                  | 58.6      | 57.88     | 0.72      |
| 2                  | 48.34     | 66.81     | -18.47    |
| 3                  | 64.73     | 81.34     | -16.61    |
| 4                  | 89.02     | 79.29     | 9.73      |
| 5                  | 77.68     | 73.85     | 3.83      |
| 6                  | 49.15     | 47.48     | 1.67      |
| 7                  | 123.95    | 133.12    | -9.17     |
| 8                  | 78.95     | 81.94     | -2.99     |
| 9                  | 54.61     | 48.3      | 6.31      |
| 10                 | 82.44     | 86.41     | -3.97     |
| 11                 | 45.06     | 50.17     | -5.11     |
| 12                 | 77.33     | 62.93     | 14.4      |
| 13                 | 75.49     | 61.65     | 13.84     |
| 14                 | 69.74     | 43.96     | 25.78     |
| 15                 | 67.31     | 56.51     | 10.8      |
| mean               | 70.83     | 68.78     | 2.05      |
| standard deviation | 19.94     | 22.54     | 12.02     |

normality test: Shapiro-Wilk test  
P value 0.99

significance test: two-tailed paired student's t-test  
P value 0.52

This section shows the MR PTV5mm overlap with CT PTV3mm

| ID                 | %overlap | %outside |
|--------------------|----------|----------|
| 1                  | 85%      | 15%      |
| 2                  | 67%      | 33%      |
| 3                  | 68%      | 32%      |
| 4                  | 75%      | 25%      |
| 5                  | 86%      | 14%      |
| 6                  | 89%      | 11%      |
| 7                  | 84%      | 16%      |
| 8                  | 86%      | 14%      |
| 9                  | 88%      | 12%      |
| 10                 | 84%      | 16%      |
| 11                 | 81%      | 19%      |
| 12                 | 95%      | 5%       |
| 13                 | 88%      | 12%      |
| 14                 | 86%      | 14%      |
| 15                 | 88%      | 12%      |
| mean               | 83%      | 17%      |
| standard deviation | 7.69%    | 7.69%    |

This section shows the CT PTV3mm overlap with MR PTV5mm

| ID                 | %overlap | %outside |
|--------------------|----------|----------|
| 1                  | 84%      | 16%      |
| 2                  | 92%      | 8%       |
| 3                  | 86%      | 14%      |
| 4                  | 67%      | 33%      |
| 5                  | 82%      | 18%      |
| 6                  | 86%      | 14%      |
| 7                  | 90%      | 10%      |
| 8                  | 89%      | 11%      |
| 9                  | 77%      | 23%      |
| 10                 | 88%      | 12%      |
| 11                 | 90%      | 10%      |
| 12                 | 77%      | 23%      |
| 13                 | 72%      | 28%      |
| 14                 | 54%      | 46%      |
| 15                 | 74%      | 26%      |
| mean               | 81%      | 19%      |
| standard deviation | 10.56%   | 10.56%   |

This section shows the MR PTV5mm extension outside CT PTV3mm by quadrant

| ID                 | ant. base         | post. base | ant. apex | post. apex |
|--------------------|-------------------|------------|-----------|------------|
| 1                  | 33%               | 35%        | 14%       | 18%        |
| 2                  | 39%               | 16%        | 16%       | 29%        |
| 3                  | 40%               | 15%        | 22%       | 23%        |
| 4                  | 61%               | 32%        | 6%        | 1%         |
| 5                  | 35%               | 43%        | 19%       | 3%         |
| 6                  | 60%               | 35%        | 3%        | 2%         |
| 7                  | 22%               | 35%        | 32%       | 10%        |
| 8                  | 30%               | 27%        | 25%       | 18%        |
| 9                  | 23%               | 42%        | 8%        | 26%        |
| 10                 | 61%               | 17%        | 5%        | 16%        |
| 11                 | 38%               | 12%        | 17%       | 32%        |
| 12                 | 52%               | 39%        | 5%        | 5%         |
| 13                 | 50%               | 39%        | 5%        | 6%         |
| 14                 | 63%               | 35%        | 0%        | 1%         |
| 15                 | 74%               | 21%        | 2%        | 3%         |
| mean               | 46%               | 30%        | 12%       | 13%        |
| standard deviation | 16%               | 11%        | 10%       | 11%        |
| normality test:    | Shapiro-Wilk test |            |           |            |
| P value            | 0.47              | 0.07       | 0.17      | 0.07       |

This section shows the CT PTV3mm extension outside MR PTV5mm by quadrant

| ID                 | ant. base         | post. base | ant. apex | post. apex |
|--------------------|-------------------|------------|-----------|------------|
| 1                  | 3%                | 28%        | 40%       | 29%        |
| 2                  | 0%                | 74%        | 21%       | 4%         |
| 3                  | 0%                | 85%        | 3%        | 12%        |
| 4                  | 0%                | 39%        | 45%       | 16%        |
| 5                  | 1%                | 15%        | 35%       | 50%        |
| 6                  | 10%               | 6%         | 31%       | 53%        |
| 7                  | 15%               | 50%        | 2%        | 34%        |
| 8                  | 5%                | 42%        | 36%       | 17%        |
| 9                  | 15%               | 22%        | 42%       | 21%        |
| 10                 | 4%                | 42%        | 30%       | 23%        |
| 11                 | 0%                | 38%        | 60%       | 2%         |
| 12                 | 22%               | 24%        | 22%       | 32%        |
| 13                 | 5%                | 22%        | 35%       | 38%        |
| 14                 | 13%               | 17%        | 37%       | 33%        |
| 15                 | 4%                | 12%        | 48%       | 36%        |
| mean               | 7%                | 34%        | 32%       | 27%        |
| standard deviation | 7%                | 22%        | 16%       | 15%        |
| normality test:    | Shapiro-Wilk test |            |           |            |
| P value            | 0.02              | 0.11       | 0.34      | 0.92       |

Comparison of means of % volume outside MR PTV5mm vs CT PTV3mm

|                    | delta ant. base                                           | delta post. base | delta ant. apex | delta post. apex |
|--------------------|-----------------------------------------------------------|------------------|-----------------|------------------|
| mean               | 39%                                                       | -5%              | -20%            | -14%             |
| standard deviation | 18%                                                       | 30%              | 22%             | 24%              |
| normality test:    | Shapiro-Wilk test                                         |                  |                 |                  |
| P value            | 0.85                                                      | 0.08             | 0.05            | 0.76             |
| significance test: | two-tailed paired student's t-test* or signed rank test** |                  |                 |                  |
| P value            | <0.001*                                                   | 0.55*            | 0.008**         | 0.048**          |

Model parameters

|        |                    |            |         |
|--------|--------------------|------------|---------|
| Rectum | EUD $\alpha$ value | TCDS0 [Gy] | gamma50 |
|        | -10                | 72         | 5       |

ref: AAPM TR166 and Radiother Oncol 2002;63:11e26

TCP for prostate CTV

| Patient ID                                                                   | parameter | pairwise comparison 1 |            |              | pairwise comparison 2 |               |                |
|------------------------------------------------------------------------------|-----------|-----------------------|------------|--------------|-----------------------|---------------|----------------|
|                                                                              |           | CTopt CT_CT           | CTopt MR_C | MRopt MR_CTV | CTopt MRI_CTV         | MRopt MRI_CTV | delta (CT-MRI) |
| 1                                                                            | TCP [%]   | 91.1287               | 90.6685    | 90.5473      | 91.1287               | 90.5473       | 0.5814         |
| 2                                                                            | TCP [%]   | 90.8582               | 90.8753    | 90.452       | 90.8582               | 90.452        | 0.4062         |
| 3                                                                            | TCP [%]   | 91.124                | 91.0111    | 90.7841      | 91.124                | 90.7841       | 0.3399         |
| 4                                                                            | TCP [%]   | 90.92                 | 86.5949    | 92.388       | 90.92                 | 92.388        | -1.468         |
| 5                                                                            | TCP [%]   | 91.0729               | 90.8408    | 90.4932      | 91.0729               | 90.4932       | 0.5797         |
| 6                                                                            | TCP [%]   | 92.295                | 92.1397    | 94.5725      | 92.295                | 94.5725       | -2.2775        |
| 7                                                                            | TCP [%]   | 93.3643               | 93.1808    | 94.8057      | 93.3643               | 94.8057       | -1.4414        |
| 8                                                                            | TCP [%]   | 91.1633               | 90.8103    | 91.6609      | 91.1633               | 91.6609       | -0.4976        |
| 9                                                                            | TCP [%]   | 91.2193               | 90.8035    | 92.2241      | 91.2193               | 92.2241       | -1.0048        |
| 10                                                                           | TCP [%]   | 91.0084               | 90.7845    | 91.9838      | 91.0084               | 91.9838       | -0.9754        |
| 11                                                                           | TCP [%]   | 91.4509               | 91.1497    | 92.7137      | 91.4509               | 92.7137       | -1.2628        |
| 12                                                                           | TCP [%]   | 92.3345               | 91.8497    | 90.5404      | 92.3345               | 90.5404       | 1.7941         |
| 13                                                                           | TCP [%]   | 91.2498               | 91.2784    | 92.3599      | 91.2498               | 92.3599       | -1.1101        |
| 14                                                                           | TCP [%]   | 93.0811               | 92.9601    | 92.0198      | 93.0811               | 92.0198       | 1.0613         |
| 15                                                                           | TCP [%]   | 92.587                | 92.2965    | 90.9755      | 92.587                | 90.9755       | 1.6115         |
| mean                                                                         |           |                       |            |              |                       |               | -0.24423       |
| median                                                                       |           |                       |            |              |                       |               | -0.4976        |
| standard deviation                                                           |           |                       |            |              |                       |               | 1.23801        |
| interquartile range                                                          |           |                       |            |              |                       |               | 1.8442         |
| normality test: Shapiro-Wilk test                                            |           |                       |            |              |                       |               | p=0.4085       |
| significance test: two-tailed paired student's t-test* or signed rank test** |           |                       |            |              |                       |               | p=0.4575*      |

p=0.0323

p=0.1688\*\*



Model parameters

|                    |           |         |
|--------------------|-----------|---------|
| EUD $\alpha$ value | TD50 [Gy] | gamma50 |
| 8                  | 76.9      | 4 and 8 |

ref: AAPM TR166 and Int J Radiat Oncol Biol Phys 2010;76(3 Suppl):S123e9

NTCP for rectum (Rx to prostate only and Rx to prostate + 1 cm SV)

| Patient ID                                            | parameter   | CT        | MRI       | delta (CT-MRI) | parameter   | CT (SV)   | MRI (SV)  | delta (CT-MRI) | parameter   | CT      | MRI     | delta (CT-MRI) | parameter   | CT (SV) | MRI (SV) | delta (CT-MRI) |
|-------------------------------------------------------|-------------|-----------|-----------|----------------|-------------|-----------|-----------|----------------|-------------|---------|---------|----------------|-------------|---------|----------|----------------|
| 1                                                     | NTCP [%] y5 | 0.0215468 | 0.143707  | -0.12216       | NTCP [%] y5 | 0.0499451 | 0.265035  | -0.21509       | NTCP [%] y5 | 1.4468  | 3.65495 | -2.20815       | NTCP [%] y5 | 2.18652 | 4.90228  | -2.71576       |
| 2                                                     | NTCP [%] y5 | 0.0221564 | 0.0474333 | -0.02528       | NTCP [%] y5 | 0.113635  | 0.087425  | 0.02621        | NTCP [%] y5 | 1.46683 | 2.13199 | -0.66516       | NTCP [%] y5 | 3.26284 | 2.87308  | 0.38976        |
| 3                                                     | NTCP [%] y5 | 0.0755005 | 0.0660177 | 0.00948        | NTCP [%] y5 | 0.154709  | 0.119142  | 0.03557        | NTCP [%] y5 | 2.67524 | 2.50583 | 0.16941        | NTCP [%] y5 | 3.78727 | 3.33846  | 0.44881        |
| 4                                                     | NTCP [%] y5 | 0.278216  | 0.115152  | 0.16306        | NTCP [%] y5 | 0.547285  | 0.162222  | 0.38506        | NTCP [%] y5 | 5.01698 | 3.28387 | 1.73311        | NTCP [%] y5 | 6.9059  | 3.87476  | 3.03114        |
| 5                                                     | NTCP [%] y5 | 0.074617  | 0.0205132 | 0.0541         | NTCP [%] y5 | 0.121023  | 0.0869297 | 0.03409        | NTCP [%] y5 | 2.65994 | 1.41216 | 1.24778        | NTCP [%] y5 | 3.36385 | 2.86515  | 0.4987         |
| 6                                                     | NTCP [%] y5 | 0.0475116 | 0.122526  | -0.07501       | NTCP [%] y5 | 0.121523  | 0.578005  | -0.45648       | NTCP [%] y5 | 2.13371 | 3.38399 | -1.25028       | NTCP [%] y5 | 3.37057 | 7.08455  | -3.71398       |
| 7                                                     | NTCP [%] y5 | 0.522454  | 0.246214  | 0.27624        | NTCP [%] y5 | 0.980051  | 0.679045  | 0.30101        | NTCP [%] y5 | 6.75734 | 4.73297 | 2.02437        | NTCP [%] y5 | 9.04843 | 7.63706  | 1.41137        |
| 8                                                     | NTCP [%] y5 | 0.0401891 | 0.0349138 | 0.00528        | NTCP [%] y5 | 0.063001  | 0.0760028 | -0.013         | NTCP [%] y5 | 1.96571 | 1.83456 | 0.13115        | NTCP [%] y5 | 2.44929 | 2.68389  | -0.2346        |
| 9                                                     | NTCP [%] y5 | 0.177199  | 0.132911  | 0.04429        | NTCP [%] y5 | 0.588484  | 0.63897   | -0.05049       | NTCP [%] y5 | 4.0429  | 3.51972 | 0.52318        | NTCP [%] y5 | 7.14427 | 7.42388  | -0.27961       |
| 10                                                    | NTCP [%] y5 | 0.153662  | 0.0126198 | 0.14104        | NTCP [%] y5 | 0.213644  | 0.0353609 | 0.17828        | NTCP [%] y5 | 3.77491 | 1.11097 | 2.66394        | NTCP [%] y5 | 4.42247 | 1.84606  | 2.57641        |
| 11                                                    | NTCP [%] y5 | 0.0749298 | 0.488852  | -0.41392       | NTCP [%] y5 | 0.141194  | 0.646128  | -0.50493       | NTCP [%] y5 | 2.66537 | 6.54987 | -3.8845        | NTCP [%] y5 | 3.62396 | 7.4625   | -3.83854       |
| 12                                                    | NTCP [%] y5 | 0.148223  | 0.0293972 | 0.11883        | NTCP [%] y5 | 0.484653  | 0.156629  | 0.32802        | NTCP [%] y5 | 3.70989 | 1.6859  | 2.02399        | NTCP [%] y5 | 6.52339 | 3.80984  | 2.71355        |
| 13                                                    | NTCP [%] y5 | 0.141861  | 0.0403511 | 0.10151        | NTCP [%] y5 | 0.181307  | 0.131498  | 0.04981        | NTCP [%] y5 | 3.63221 | 1.96959 | 1.66262        | NTCP [%] y5 | 4.08767 | 3.50159  | 0.58608        |
| 14                                                    | NTCP [%] y5 | 0.320052  | 0.0454292 | 0.27462        | NTCP [%] y5 | 0.60251   | 0.140795  | 0.46172        | NTCP [%] y5 | 5.36253 | 2.0874  | 3.27513        | NTCP [%] y5 | 7.22326 | 3.61903  | 3.60423        |
| 15                                                    | NTCP [%] y5 | 0.186822  | 0.0443328 | 0.14249        | NTCP [%] y5 | 0.342394  | 0.100389  | 0.24201        | NTCP [%] y5 | 4.14692 | 2.06256 | 2.08436        | NTCP [%] y5 | 5.53694 | 3.07262  | 2.46432        |
| mean                                                  |             |           |           | 0.0463         |             |           |           | 0.05345        |             |         |         | 0.63539        |             |         |          | 0.46279        |
| standard deviation                                    |             |           |           | 0.17078        |             |           |           | 0.28348        |             |         |         | 1.96253        |             |         |          | 2.3605         |
| normality test: Shapiro-Wilk test                     |             |           |           | p=0.1154       |             |           |           | p=0.3344       |             |         |         | p=0.2659       |             |         |          | p=0.1247       |
| significance test: two-tailed paired student's t-test |             |           |           | p=0.3114       |             |           |           | p=0.4473       |             |         |         | p=0.2304       |             |         |          | p=0.4603       |

| Patient #                                                                                        | 1     | 2      | 3      | 4      | 5      | 6      | 7      | 8      | 9      | 10     | 11     | 12     | 13     | 14     | 15     |
|--------------------------------------------------------------------------------------------------|-------|--------|--------|--------|--------|--------|--------|--------|--------|--------|--------|--------|--------|--------|--------|
| <u>CTV volume</u>                                                                                |       |        |        |        |        |        |        |        |        |        |        |        |        |        |        |
| MR prostate                                                                                      | 23.9  | 28.69  | 38.38  | 37.4   | 33.52  | 18.98  | 71.81  | 37.95  | 18.57  | 40.21  | 20.08  | 27.08  | 26.2   | 15.62  | 23.52  |
| MR prostate+1cmSV                                                                                | 27.12 | 30.62  | 41.39  | 42.14  | 37.62  | 21.72  | 76.22  | 42.76  | 21.22  | 43.52  | 24.01  | 29.25  | 28.62  | 17.69  | 26.5   |
| MR prostate/SV                                                                                   | 29.83 | 37.86  | 47.27  | 46.82  | 43.73  | 23.19  | 83.17  | 43.42  | 24.13  | 45.32  | 29.27  | 36.86  | 30.49  | 21.3   | 29.46  |
| CT prostate                                                                                      | 36.97 | 29.91  | 41.27  | 59.62  | 50.5   | 30.96  | 86.09  | 51.48  | 32.84  | 53.88  | 27.1   | 50.94  | 48.88  | 45.19  | 43.88  |
| CT prostate+1cmSV                                                                                | 40.49 | 39.27  | 46.29  | 65.39  | 56.71  | 34.84  | 92.83  | 57.4   | 38.78  | 60.06  | 32.62  | 55.25  | 50.85  | 52.41  | 48.09  |
| CT prostate/SV                                                                                   | 42.84 | 43.03  | 50.31  | 68.56  | 64.4   | 43.16  | 101.48 | 58.2   | 43.92  | 62.82  | 41.42  | 65.28  | 51.75  | 58.63  | 52.29  |
| <u>CTV+5mm volume</u>                                                                            |       |        |        |        |        |        |        |        |        |        |        |        |        |        |        |
| MR prostate                                                                                      | 57.88 | 66.81  | 81.34  | 79.29  | 73.85  | 47.48  | 133.12 | 81.94  | 48.3   | 86.41  | 50.17  | 62.93  | 61.65  | 43.96  | 56.51  |
| MR prostate+1cmSV                                                                                | 61.86 | 71.45  | 87.76  | 90.48  | 87.27  | 56.79  | 145.75 | 96.25  | 58.2   | 96.86  | 59.72  | 74.88  | 71.22  | 51.4   | 65.2   |
| MR prostate/SV                                                                                   | 71.45 | 96.19  | 109.78 | 104.02 | 108.51 | 64.14  | 167    | 99.05  | 73.17  | 106.53 | 77.61  | 101.07 | 81.3   | 68.65  | 78.65  |
| CT prostate                                                                                      | 80.45 | 68.49  | 90.83  | 120.02 | 104.62 | 67.65  | 162.6  | 107.06 | 77.05  | 111.2  | 64.74  | 104.06 | 102.64 | 94.26  | 90.96  |
| CT prostate+1cmSV                                                                                | 90.51 | 94.92  | 104.01 | 133.82 | 121.33 | 78.71  | 180.38 | 122.31 | 94.14  | 127.25 | 79.13  | 119.29 | 111.16 | 113.34 | 104.67 |
| CT prostate/SV                                                                                   | 99.3  | 104.56 | 115.59 | 143.81 | 143.88 | 104.17 | 203.77 | 124.73 | 114.15 | 136.56 | 105.33 | 145.78 | 114.73 | 133.56 | 122.66 |
| <u>CTV+3mm volume</u>                                                                            |       |        |        |        |        |        |        |        |        |        |        |        |        |        |        |
| MR prostate                                                                                      | 40.27 | 47.35  | 59.49  | 57.83  | 53.17  | 32.86  | 102.08 | 59.46  | 32.85  | 63.33  | 34.16  | 44.45  | 43.11  | 31.52  | 39.26  |
| MR prostate+1cmSV                                                                                | 42.66 | 50.78  | 64.16  | 65.51  | 61.88  | 38.99  | 110.38 | 68.59  | 38.69  | 70.17  | 40.96  | 50.92  | 48.63  | 36.37  | 45.07  |
| MR prostate/SV                                                                                   | 48.76 | 67.06  | 77.39  | 74.27  | 75.79  | 43.2   | 124.14 | 70.24  | 47.36  | 75.54  | 52.34  | 67.25  | 54.05  | 46.94  | 52.91  |
| CT prostate                                                                                      | 58.6  | 48.34  | 64.73  | 89.02  | 77.68  | 49.15  | 123.95 | 78.95  | 54.61  | 82.44  | 45.06  | 77.33  | 75.49  | 69.74  | 67.31  |
| CT prostate+1cmSV                                                                                | 65.54 | 65.9   | 73.72  | 98.73  | 89.38  | 56.83  | 135.63 | 89.71  | 65.64  | 93.86  | 54.79  | 86.77  | 80.4   | 82.57  | 76.09  |
| CT prostate/SV                                                                                   | 70.99 | 72.59  | 81.67  | 105.34 | 104.65 | 74.2   | 151.63 | 91.34  | 78.24  | 100.24 | 72.62  | 104.9  | 82.58  | 178.29 | 86.93  |
| <u>MR PTV5mm - CT PTV3mm (i.e. how much and where does the MR PTV extend outside the CT PTV)</u> |       |        |        |        |        |        |        |        |        |        |        |        |        |        |        |
| prostate MR PTV5mm                                                                               | 8.86  | 22.21  | 25.85  | 19.96  | 10.32  | 5      | 21.51  | 11.64  | 6.01   | 14.22  | 9.43   | 3.46   | 7.44   | 6.37   | 6.52   |
| %outside                                                                                         | 15%   | 33%    | 32%    | 25%    | 14%    | 11%    | 16%    | 14%    | 12%    | 16%    | 19%    | 5%     | 12%    | 14%    | 12%    |
| %overlap                                                                                         | 85%   | 67%    | 68%    | 75%    | 86%    | 89%    | 84%    | 86%    | 88%    | 84%    | 81%    | 95%    | 88%    | 86%    | 88%    |
| ant. base                                                                                        | 2.88  | 8.71   | 10.34  | 12.16  | 3.6    | 2.98   | 4.83   | 3.51   | 1.41   | 8.74   | 3.62   | 1.81   | 3.73   | 4.03   | 4.81   |
| post. base                                                                                       | 3.13  | 3.55   | 3.84   | 6.39   | 4.46   | 1.76   | 7.49   | 3.11   | 2.51   | 2.48   | 1.15   | 1.34   | 2.91   | 2.25   | 1.36   |
| ant. apex                                                                                        | 1.27  | 3.53   | 5.71   | 1.27   | 1.94   | 0.15   | 6.98   | 2.94   | 0.5    | 0.7    | 1.65   | 0.16   | 0.34   | 0.02   | 0.13   |
| post. apex                                                                                       | 1.58  | 6.42   | 5.96   | 0.14   | 0.31   | 0.11   | 2.21   | 2.08   | 1.58   | 2.31   | 3      | 0.16   | 0.46   | 0.07   | 0.22   |
| %ant. base                                                                                       | 33%   | 39%    | 40%    | 61%    | 35%    | 60%    | 22%    | 30%    | 23%    | 61%    | 38%    | 52%    | 50%    | 63%    | 74%    |
| %post. base                                                                                      | 35%   | 16%    | 15%    | 32%    | 43%    | 35%    | 35%    | 27%    | 42%    | 17%    | 12%    | 39%    | 39%    | 35%    | 21%    |
| %ant. apex                                                                                       | 14%   | 16%    | 22%    | 6%     | 19%    | 3%     | 32%    | 25%    | 8%     | 5%     | 17%    | 5%     | 5%     | 0%     | 2%     |
| %post. apex                                                                                      | 18%   | 29%    | 23%    | 1%     | 3%     | 2%     | 10%    | 18%    | 26%    | 16%    | 32%    | 5%     | 6%     | 1%     | 3%     |
| prostate+1cmSV MR                                                                                | 10.21 | 22.26  | 29.51  | 21.3   | 13.74  | 7.96   | 24.91  | 15.85  | 8.03   | 15.45  | 11.06  | 6.42   | 11.47  | 10.05  | 9.36   |
| prostate/SV MR PTV5mm                                                                            | 14.4  | 40.03  | 40.69  | 27.09  | 25.32  | 9.47   | 34.81  | 16.76  | 11.75  | 20.75  | 16.48  | 15.5   | 19.15  | 5.74   | 15.88  |
| <u>CT PTV3mm - MR PTV5mm (i.e. how much and where does the CT PTV extend outside the MR PTV)</u> |       |        |        |        |        |        |        |        |        |        |        |        |        |        |        |
| prostate CT PTV3mm                                                                               | 9.59  | 3.74   | 9.24   | 29.7   | 14.14  | 6.67   | 12.34  | 8.65   | 12.31  | 10.26  | 4.31   | 17.87  | 21.28  | 32.15  | 17.32  |
| %outside                                                                                         | 16%   | 8%     | 14%    | 33%    | 18%    | 14%    | 10%    | 11%    | 23%    | 12%    | 10%    | 23%    | 28%    | 46%    | 26%    |
| %overlap                                                                                         | 84%   | 92%    | 86%    | 67%    | 82%    | 86%    | 90%    | 89%    | 77%    | 88%    | 90%    | 77%    | 72%    | 54%    | 74%    |
| ant. base                                                                                        | 0.26  | 0      | 0.01   | 0.12   | 0.08   | 0.64   | 1.89   | 0.41   | 1.89   | 0.45   | 0      | 3.96   | 1.11   | 4.3    | 0.67   |
| post. base                                                                                       | 2.72  | 2.78   | 7.85   | 11.5   | 2.17   | 0.4    | 6.11   | 3.64   | 2.66   | 4.28   | 1.65   | 4.27   | 4.67   | 5.42   | 2.13   |
| ant. apex                                                                                        | 3.85  | 0.8    | 0.27   | 13.46  | 4.89   | 2.07   | 0.19   | 3.15   | 5.17   | 3.12   | 2.59   | 4      | 7.36   | 11.81  | 8.29   |
| post. apex                                                                                       | 2.76  | 0.16   | 1.12   | 4.62   | 7      | 3.56   | 4.16   | 1.44   | 2.6    | 2.41   | 0.08   | 5.64   | 8.15   | 10.62  | 6.24   |
| %ant. base                                                                                       | 3%    | 0%     | 0%     | 0%     | 1%     | 10%    | 15%    | 5%     | 15%    | 4%     | 0%     | 22%    | 5%     | 13%    | 4%     |
| %post. base                                                                                      | 28%   | 74%    | 85%    | 39%    | 15%    | 6%     | 50%    | 42%    | 22%    | 42%    | 38%    | 24%    | 22%    | 17%    | 12%    |
| %ant. apex                                                                                       | 40%   | 21%    | 3%     | 45%    | 35%    | 31%    | 2%     | 36%    | 42%    | 30%    | 60%    | 22%    | 35%    | 37%    | 48%    |
| %post. apex                                                                                      | 29%   | 4%     | 12%    | 16%    | 50%    | 53%    | 34%    | 17%    | 21%    | 23%    | 2%     | 32%    | 38%    | 33%    | 36%    |
| prostate+1cmSV CT PTV3mm                                                                         | 13.89 | 16.71  | 15.48  | 29.55  | 15.85  | 7.99   | 14.79  | 9.31   | 15.48  | 12.46  | 6.12   | 18.3   | 20.65  | 41.22  | 20.25  |
| prostate/SV CT PTV3mm                                                                            | 13.95 | 16.43  | 12.58  | 28.4   | 21.47  | 19.53  | 19.45  | 9.05   | 16.82  | 14.45  | 11.49  | 19.34  | 20.42  | 115.38 | 24.16  |
